# Supplementary material for: Versatile Poly(Diallyl Dimethyl Ammonium Chloride)-Layered Nanocomposites for Removal of Cesium in Water Purification
Source: MDPI journal article supplement (doi:10.3390/ma11060998), 2018-06-12
Supplement: s1 [file s1]

# Supplementary Materials: Versatile Poly(diallyl dimethyl ammonium chloride)-Layered Nanocomposites for Removal of Cesium in Water Purification

Sung-Chan Jang, Sung-Min Kang, Gi Yong Kim, Muruganantham Rethinasabapathy, Yuvaraj Haldorai, Ilsong Lee, Young-Kyu Han, Joanna C. Renshaw, Changhyun Roh, Yun Suk Huh

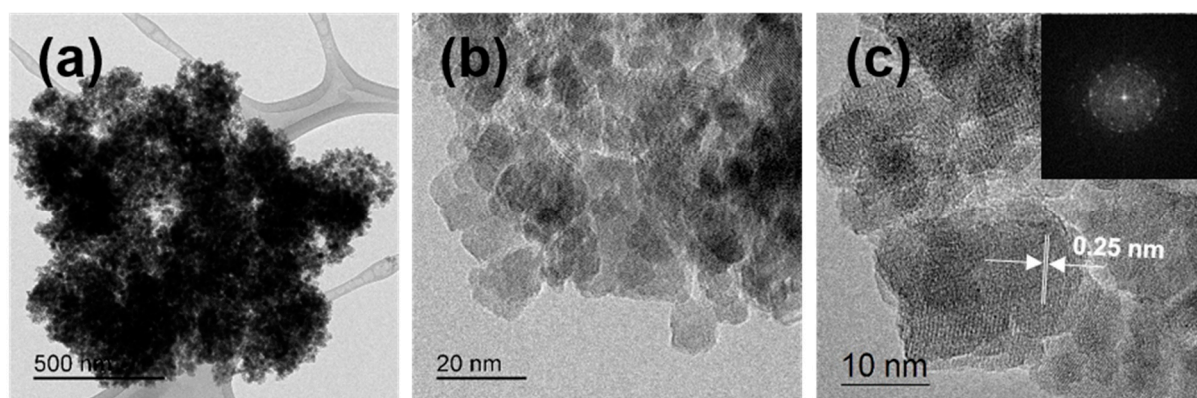

Figure S1. (a-c) TEM images of  $\text{Fe}_3\text{O}_4$  nanoparticles.

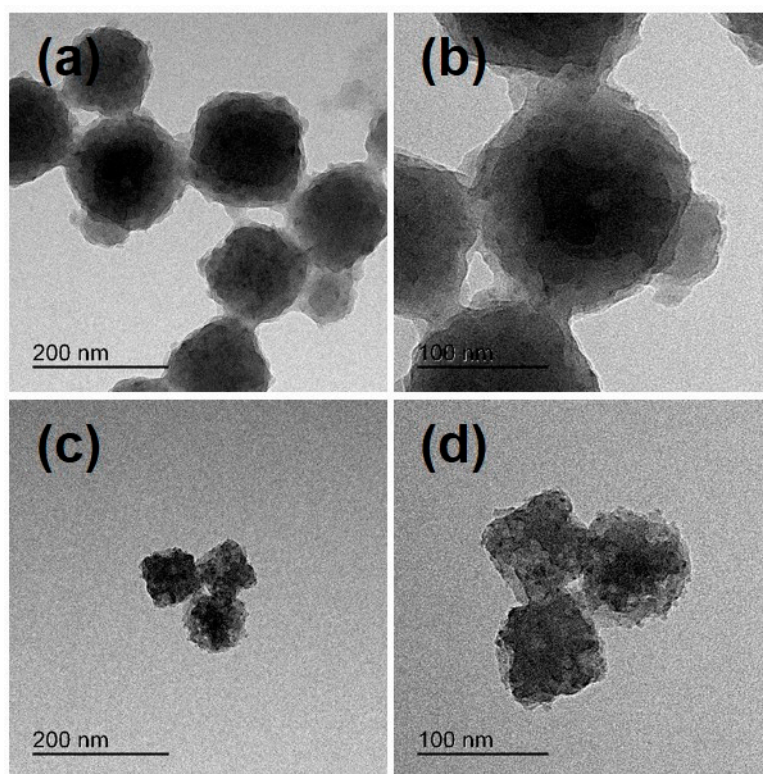

Figure S2. (a) TEM image of MPB and (b) magnified image. (c) TEM image of HPB and (d) magnified image.

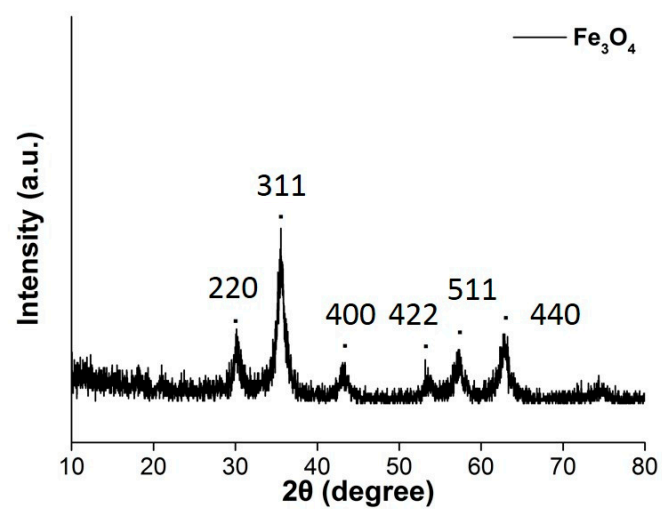

**Figure S3.** XRD patterns of  $\text{Fe}_3\text{O}_4$  nanoparticles.
